# Supplementary material for: Non-stomatal exchange in ammonia dry deposition models: comparison of twostate-of-the-art approaches
Source: Copernicus journal article supplement (doi:10.5194/acp-16-13417-2016), 2016-10-31
Supplement: Supplementary file 1 [file acp-16-13417-2016-supplement.pdf]

Supplement of Atmos. Chem. Phys., 16, 13417–13430, 2016  
<http://www.atmos-chem-phys.net/16/13417/2016/>  
doi:10.5194/acp-16-13417-2016-supplement  
© Author(s) 2016. CC Attribution 3.0 License.

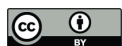

*Supplement of*

## **Non-stomatal exchange in ammonia dry deposition models: comparison of two state-of-the-art approaches**

**Frederik Schrader et al.**

*Correspondence to:* Frederik Schrader ([frederik.schrader@thuenen.de](mailto:frederik.schrader@thuenen.de))

The copyright of individual parts of the supplement might differ from the CC-BY 3.0 licence.

**Table S1: List of frequently used symbols. Note that in some cases appropriate unit conversions are used in the text.**

| Symbol                           | Unit                               | Description                                                                                                          |
|----------------------------------|------------------------------------|----------------------------------------------------------------------------------------------------------------------|
| $a$                              | –                                  | exponential decay parameter in the MNS non-stomatal resistance parameterization                                      |
| $AR$                             | –                                  | molar ratio of total acid to ammonia concentrations ( $(2[\text{SO}_2]+[\text{HNO}_3]+[\text{HCl}])/[\text{NH}_3]$ ) |
| $d$                              | m                                  | zero-plane displacement height                                                                                       |
| $D_{\text{NH}_3}$                | $\text{m}^2 \text{s}^{-1}$         | molecular diffusivity of ammonia in air                                                                              |
| $F_t$                            | $\mu\text{g m}^{-2} \text{s}^{-1}$ | total (stomatal + non-stomatal) net flux density                                                                     |
| $G_w$                            | $\text{m s}^{-1}$                  | non-stomatal conductance ( $= R_w^{-1}$ )                                                                            |
| $H$                              | $\text{W m}^{-2}$                  | sensible heat flux                                                                                                   |
| $h_c$                            | m                                  | canopy height                                                                                                        |
| $k$                              | –                                  | von Kármán constant ( $= 0.41$ )                                                                                     |
| $L$                              | m                                  | Obukhov length                                                                                                       |
| $LAI$                            | $\text{m}^2 \text{m}^{-2}$         | one-sided leaf area index                                                                                            |
| $LE$                             | $\text{W m}^{-2}$                  | latent heat flux                                                                                                     |
| $R_a\{z - d\}$                   | $\text{s m}^{-1}$                  | aerodynamic resistance at the reference height                                                                       |
| $R_b$                            | $\text{s m}^{-1}$                  | quasi-laminar boundary layer resistance                                                                              |
| $R_c$                            | $\text{s m}^{-1}$                  | canopy resistance                                                                                                    |
| $R_s$                            | $\text{s m}^{-1}$                  | stomatal resistance                                                                                                  |
| $R_w$                            | $\text{s m}^{-1}$                  | non-stomatal resistance                                                                                              |
| $R_{w,\text{eff}}$               | $\text{s m}^{-1}$                  | effective non-stomatal resistance                                                                                    |
| $R_{w,\text{min}}$               | $\text{s m}^{-1}$                  | minimum non-stomatal resistance in the MNS parameterization                                                          |
| $R_{w,\text{MNS}}$               | $\text{s m}^{-1}$                  | modeled non-stomatal resistance after Massad et al. (2010)                                                           |
| $R_{w,\text{obs}}$               | $\text{s m}^{-1}$                  | observed non-stomatal resistance                                                                                     |
| $R_{w,\text{WK}}$                | $\text{s m}^{-1}$                  | modeled non-stomatal resistance after Wichink Kruit et al. (2010)                                                    |
| $RH$                             | %                                  | relative humidity                                                                                                    |
| $SN$                             | –                                  | molar ratio of sulfur dioxide to ammonia concentrations ( $[\text{SO}_2]/[\text{NH}_3]$ )                            |
| $T$                              | $^\circ\text{C}$                   | (air) temperature                                                                                                    |
| $u_*$                            | $\text{m s}^{-1}$                  | friction velocity                                                                                                    |
| $u\{z - d\}$                     | $\text{m s}^{-1}$                  | wind velocity at the reference height                                                                                |
| $v_{d,\text{max}}\{z - d\}$      | $\text{m s}^{-1}$                  | maximum deposition velocity allowed by turbulence                                                                    |
| $v_d\{z - d\}$                   | $\text{m s}^{-1}$                  | deposition velocity at the reference height                                                                          |
| $z$                              | m                                  | measurement height above ground                                                                                      |
| $z_0$                            | m                                  | roughness length                                                                                                     |
| $z'_0$                           | m                                  | notional height of trace gas exchange                                                                                |
| $z - d$                          | m                                  | reference height                                                                                                     |
| $\beta$                          | $^\circ\text{C}^{-1}$              | temperature response parameter in the MNS non-stomatal resistance parameterization                                   |
| $\Gamma_g$                       | –                                  | ground-layer emission potential                                                                                      |
| $\Gamma_s$                       | –                                  | stomatal emission potential                                                                                          |
| $\Gamma_w$                       | –                                  | non-stomatal emission potential                                                                                      |
| $\nu_{\text{air}}$               | $\text{m}^2 \text{s}^{-1}$         | kinematic viscosity of air                                                                                           |
| $\chi_{a,(n\text{ d})\text{MA}}$ | $\mu\text{g m}^{-3}$               | backward-looking moving average of ambient concentration (with $n$ -day moving window)                               |
| $\chi_a\{z - d\}$                | $\mu\text{g m}^{-3}$               | ambient concentration at the reference height                                                                        |
| $\chi_c$                         | $\mu\text{g m}^{-3}$               | canopy compensation point                                                                                            |
| $\chi_s$                         | $\mu\text{g m}^{-3}$               | stomatal compensation point                                                                                          |
| $\chi_w$                         | $\mu\text{g m}^{-3}$               | non-stomatal compensation point                                                                                      |
| $\Psi_H$                         | –                                  | integrated stability correction function for entrained scalars                                                       |
| $\Psi_M$                         | –                                  | integrated stability correction function for momentum                                                                |

## References

- Massad, R.-S., Nemitz, E., and Sutton, M. A.: Review and parameterisation of bi-directional ammonia exchange between vegetation and the atmosphere, *Atmospheric Chemistry and Physics*, 10(21), 10359–10386, doi:10.5194/acp-10-10359-2010, 2010.
- 5 Wichink Kruit, R. J., van Pul, W. A. J., Sauter, F. J., van den Broek, M., Nemitz, E., Sutton, M. A., Krol, M., and Holtslag, A. A. M.: Modeling the surface–atmosphere exchange of ammonia, *Atmospheric Environment*, 44(7), 945–957, doi:10.1016/j.atmosenv.2009.11.049, 2010.
